# Supplementary material for: The Causal Relationship Between Blood Lipids and Systemic Lupus Erythematosus Risk: A Bidirectional Two-Sample Mendelian Randomization Study
Source: PubMed Central journal article supplement (PMC9043646; doi:10.3389/fgene.2022.858653), 2022-04-13

**a**

MR Test

- ▬ Inverse variance weighted
- ▬ MR Egger
- ▬ Simple mode
- ▬ Weighted median
- ▬ Weighted mode

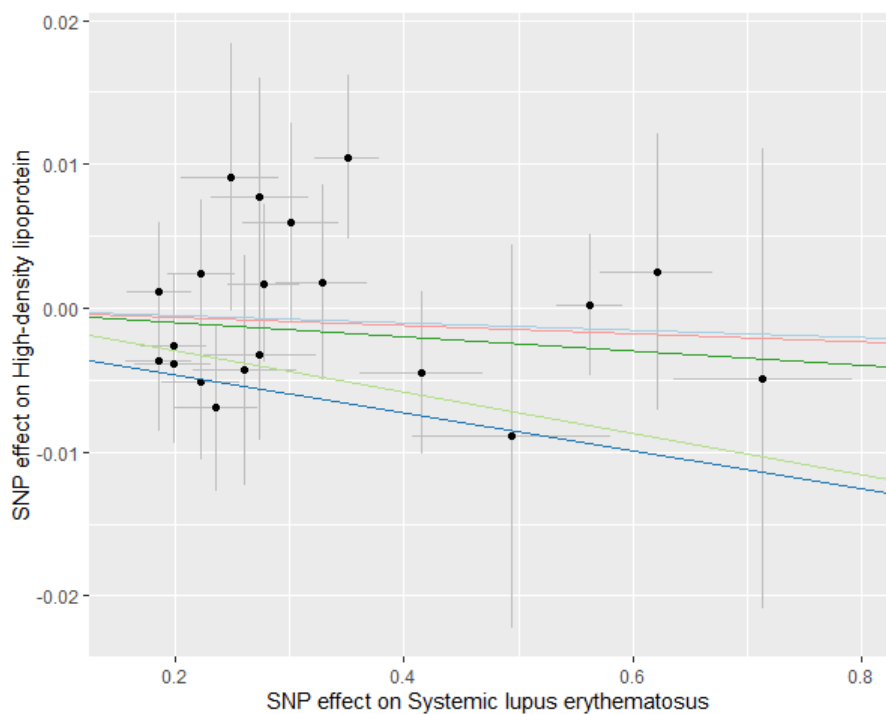**b**

MR Test

- ▬ Inverse variance weighted
- ▬ MR Egger
- ▬ Simple mode
- ▬ Weighted median
- ▬ Weighted mode

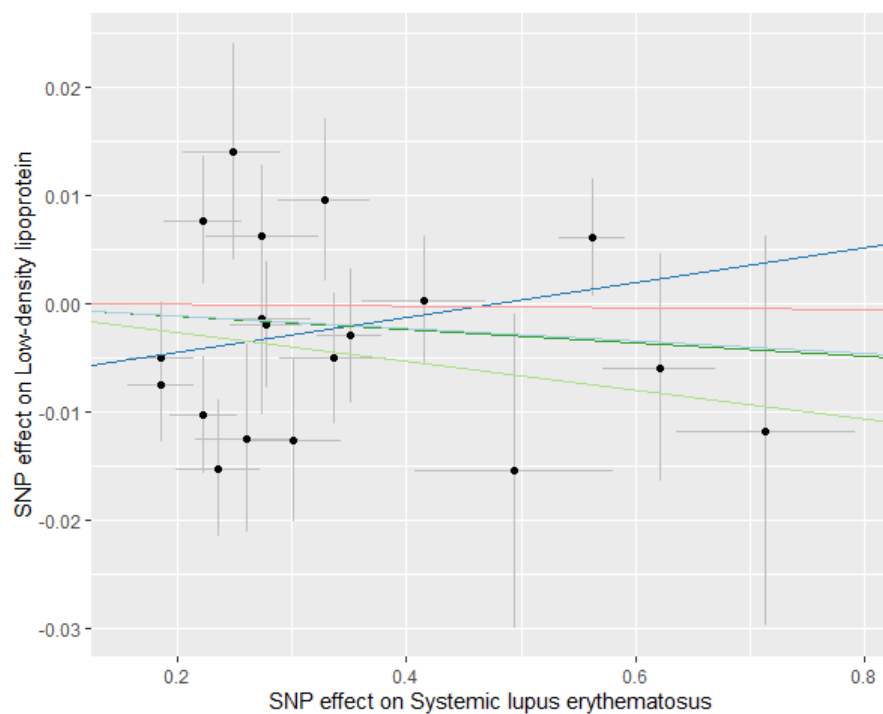**c**

MR Test

- ▬ Inverse variance weighted
- ▬ MR Egger
- ▬ Simple mode
- ▬ Weighted median
- ▬ Weighted mode

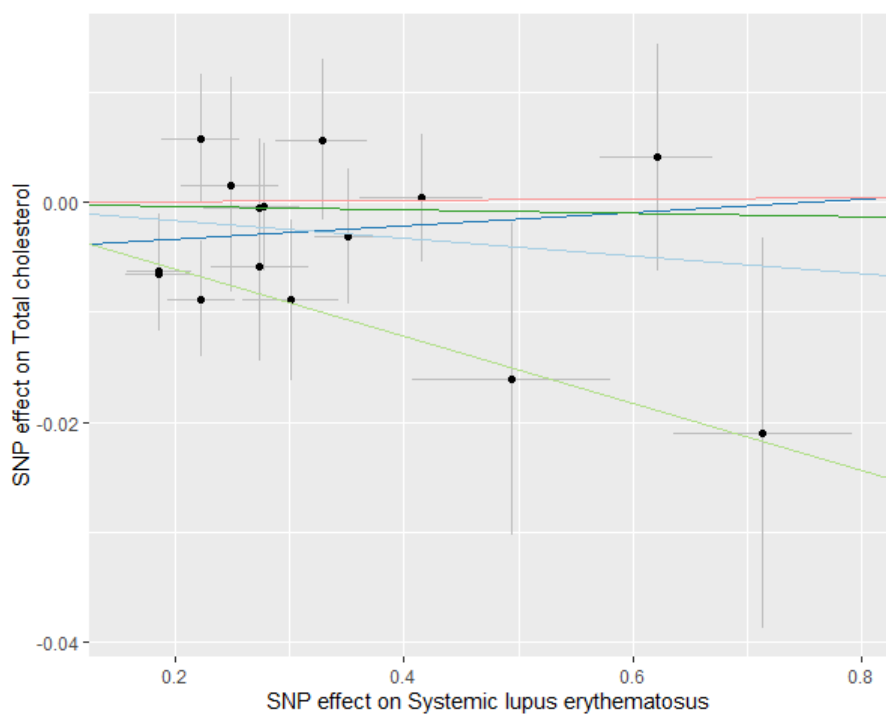**d**

MR Test

- ▬ Inverse variance weighted
- ▬ MR Egger
- ▬ Simple mode
- ▬ Weighted median
- ▬ Weighted mode

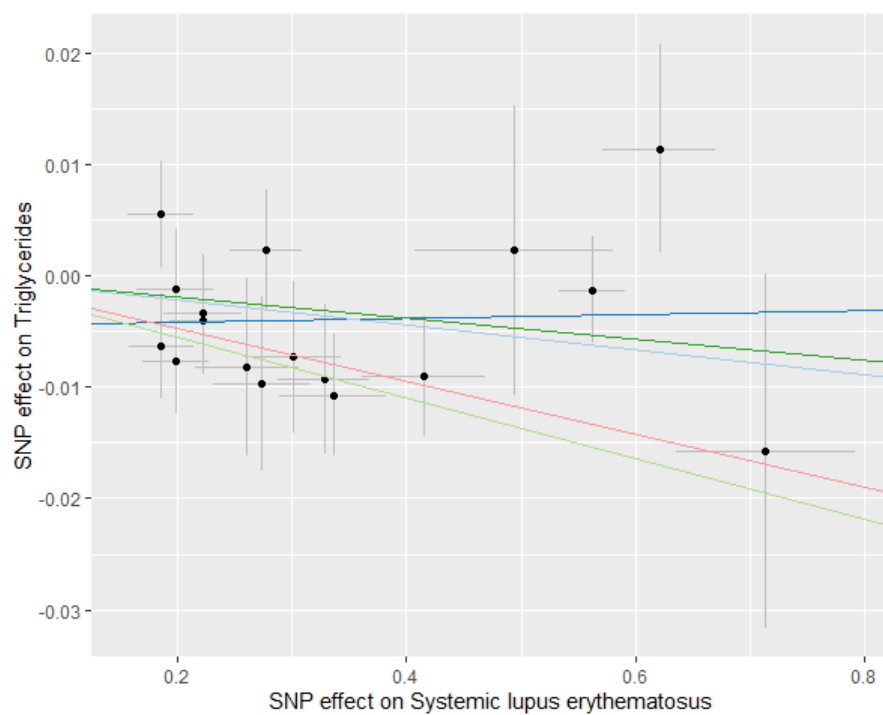

Supplement: Image4.pdf [file Image4.pdf]
