# Supplementary material for: The Causal Relationship Between Blood Lipids and Systemic Lupus Erythematosus Risk: A Bidirectional Two-Sample Mendelian Randomization Study
Source: PubMed Central journal article supplement (PMC9043646; doi:10.3389/fgene.2022.858653), 2022-04-13

**a**

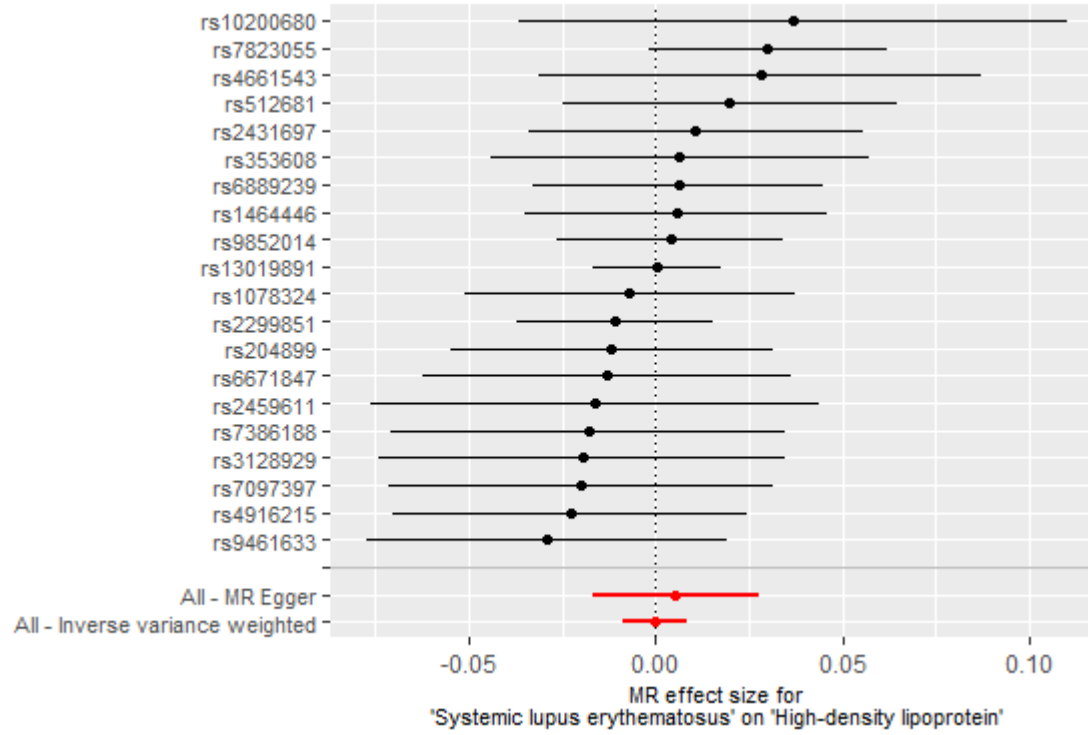

**b**

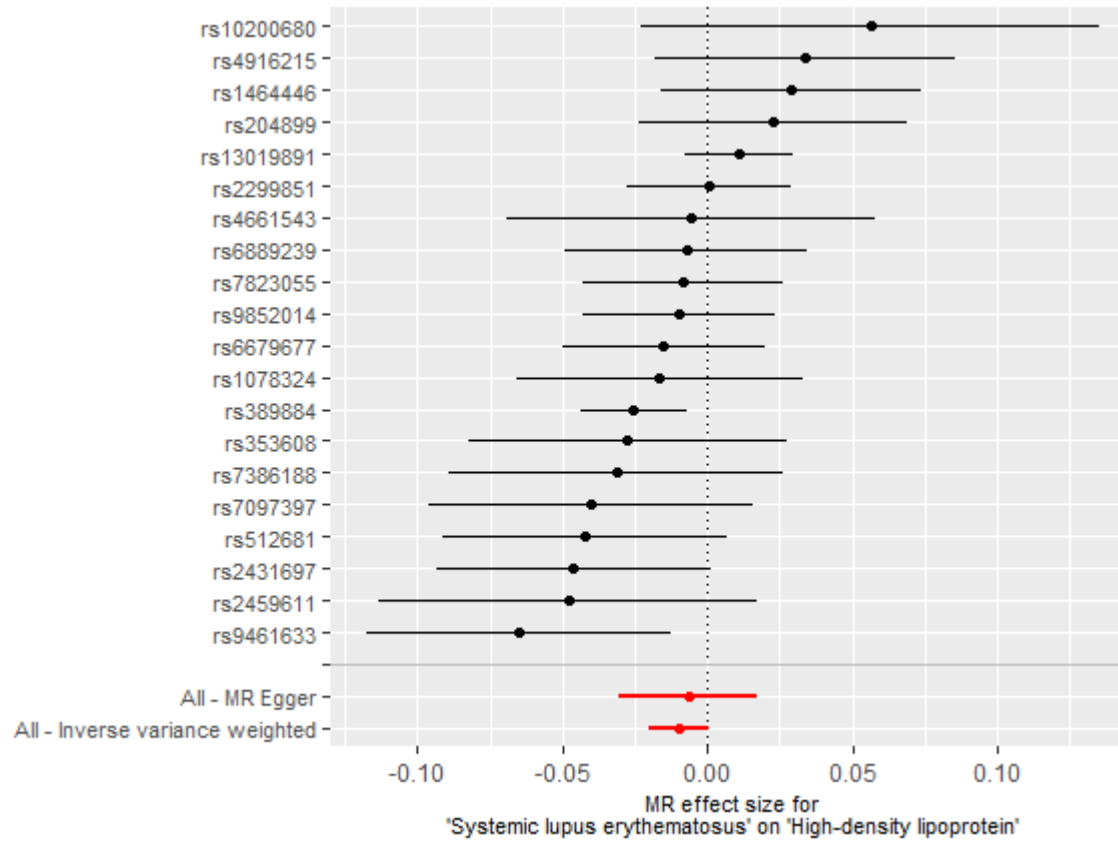

c

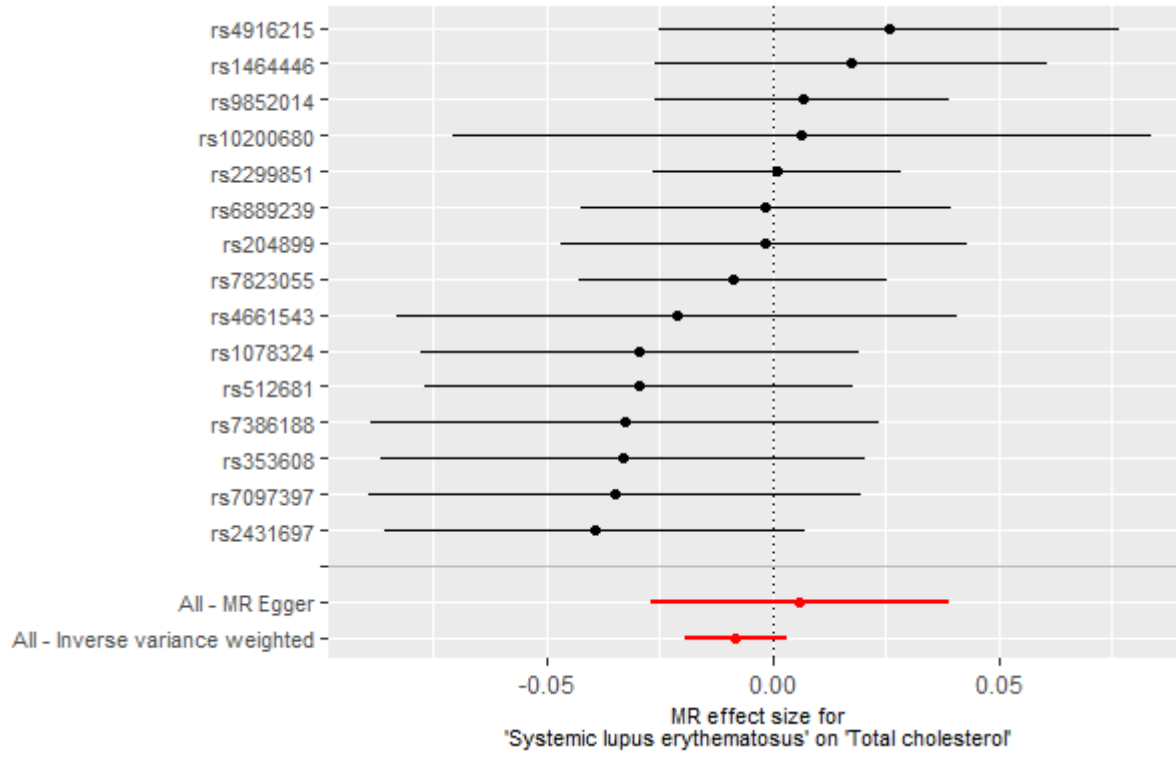

d

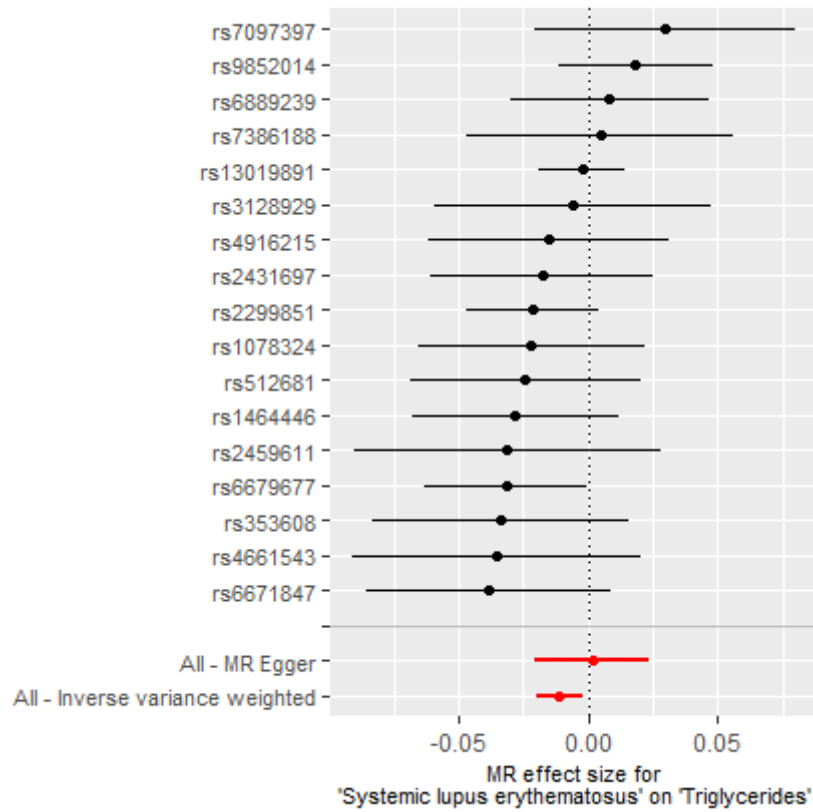

Supplement: Image5.pdf [file Image5.pdf]
